# Supplementary material
Source: PubMed Central journal article supplement (PMC1240119)
Supplement: JCI0526007sd.pdf [file JCI0526007sd.pdf]

**A**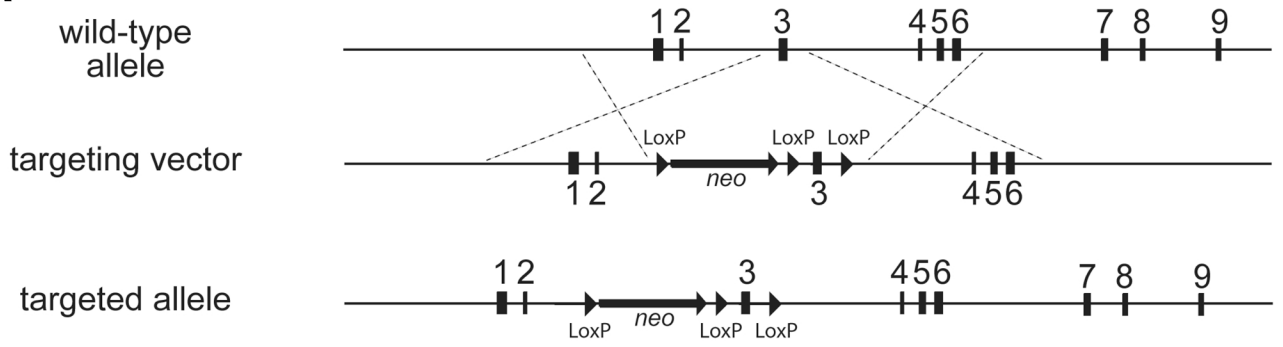**B**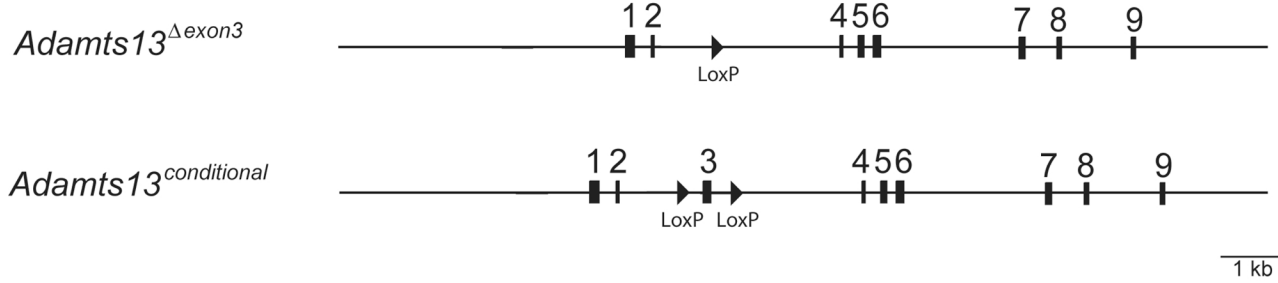

**Figure 1S.** Generation of *Adamts13*<sup>Δ*exon3*</sup> deficient mice, and mice with a conditionally-null *Adamts13* allele. **(A)** Schematic diagrams of the wild-type and targeted *Adamts13* alleles, and the targeting vector. In the targeted allele, exon 3 of *Adamts13* has been flanked with Lox P sequences. In addition, a neomycin cassette has been inserted between exons 2 and 3, and is also flanked by Lox P sequences. Exons are indicated as numbered boxes. **(B)** Schematic diagrams of the *Adamts13*<sup>Δ*exon3*</sup> and conditionally-null *Adamts13* alleles. Mice heterozygous for the targeted allele in **(A)** were crossed to mice expressing the Cre recombinase under control of the adenovirus EIIa promoter (S1), resulting in mice mosaic for the three possible Cre-mediated Lox P recombination events. These mosaic mice were then crossed with C57BL/6J mice, resulting in progeny heterozygous for the *Adamts13*<sup>Δ*exon3*</sup> and conditionally-null *Adamts13* alleles indicated. Subsequently, *Adamts13*<sup>Δ*exon3*</sup><sup>+/-</sup> mice were intercrossed resulting in the expected Mendelian distribution of progeny. The conditionally-null *Adamts13* heterozygotes are being maintained in backcross with C57BL/6J mice for use in future experiments. Correct targeting of all alleles was verified by Southern blotting and genomic PCR (not shown). RT-PCR of liver mRNA prepared from *Adamts13*<sup>Δ*exon3*</sup><sup>-/-</sup> mice demonstrated the absence of transcripts containing exon 3, and specific VWF-cleaving activity was absent from plasma prepared from *Adamts13*<sup>Δ*exon3*</sup><sup>-/-</sup> mice using full-length purified VWF as a substrate (not shown).

#### Supplemental reference

S1. Xu, X., et al. 2001. Direct removal in the mouse of a floxed neo gene from a three-loxP conditional knockout allele by two novel approaches. *Genesis*. **30**:1–6.
